# Supplementary material for: Rheokinetics of ε-caprolactam anionic-ring polymerization applied to the rapid production of thermoplastic composites
Source: Royal Society of Chemistry journal article supplement (doi:10.1039/d5lp00015g), 2025-01-01
Supplement: d5lp00015g1.pdf [file d5lp00015g1.pdf]

Rheokinetics of  $\epsilon$ -caprolactam anionic-ring polymerization applied to the rapid  
production of thermoplastic composites

Karima Ben Hamou<sup>1</sup>, Ralf Brüning<sup>2</sup>, Gabriel LaPlante<sup>3</sup>, Marie-Hélène Thibault<sup>1</sup>, Jacques Robichaud<sup>1</sup>, Yahia Djaoued<sup>1</sup>

<sup>1</sup>Laboratoire de Recherche en Matériaux et Micro-spectroscopies Raman et FTIR,  
Université de Moncton, Campus de Shippagan, Shippagan, Nouveau Brunswick, Canada.

<sup>2</sup>Physics Department, Mount Allison University, Sackville, New Brunswick, Canada.

<sup>3</sup>Faculté d'ingénierie, Université de Moncton, Campus de Moncton, Moncton, New  
Brunswick, Canada.

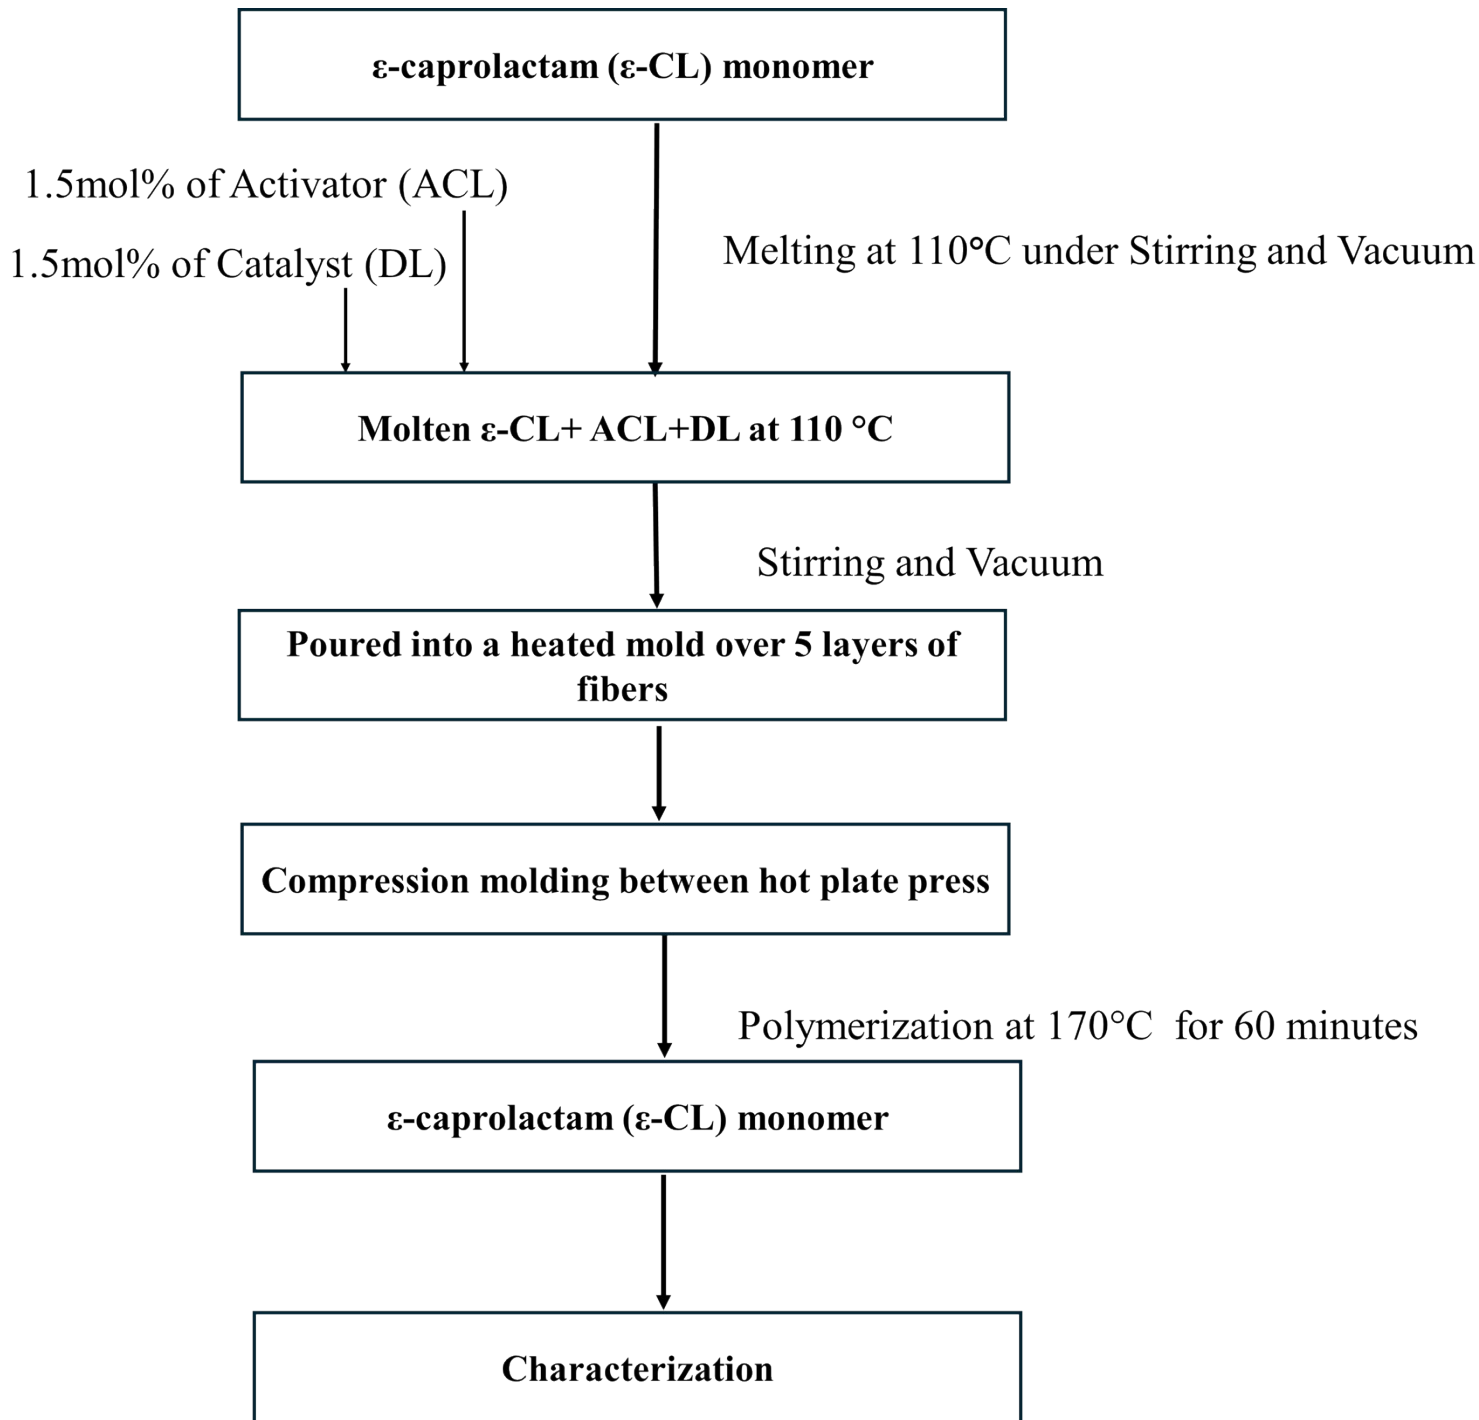

**Fig. S1** Flowchart of the fabrication process of the hybrid glass/treated hemp fiber composite samples.

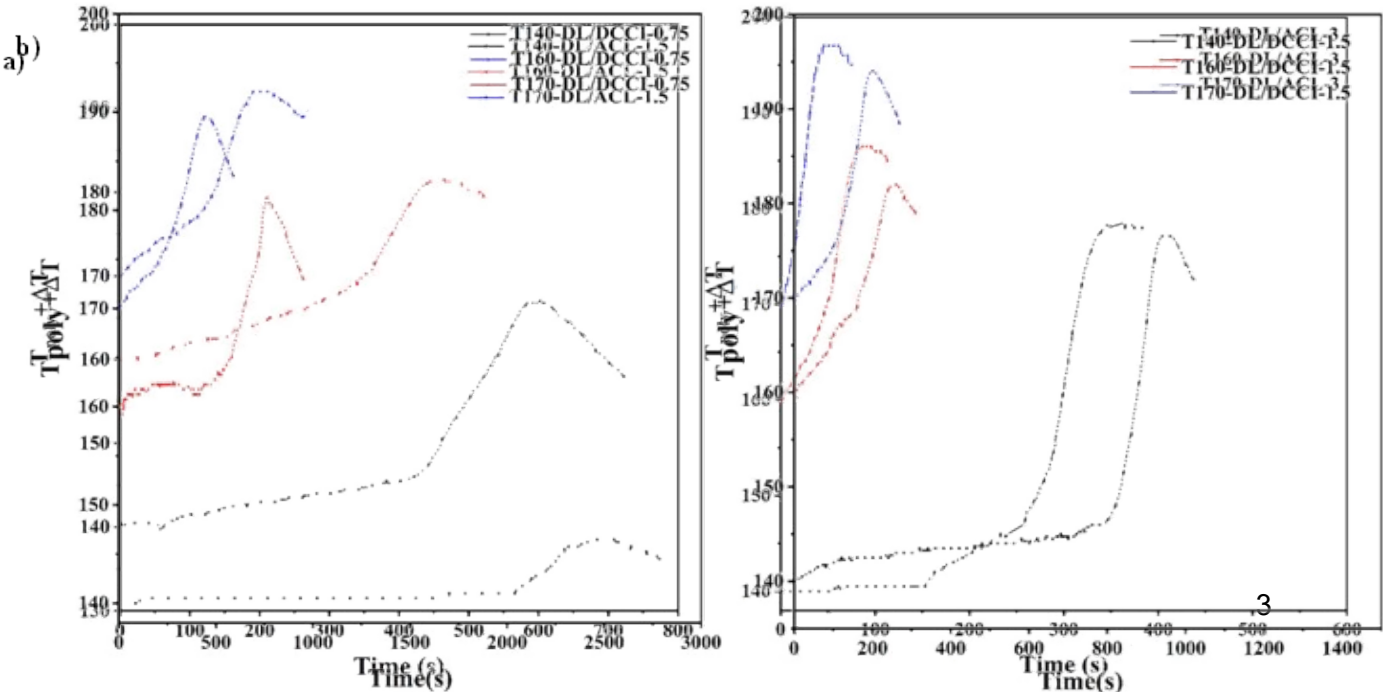

**Fig. S2** Temperature change with time dependence ( $T_{\text{poly}}=140^{\circ}\text{C}, 160^{\circ}\text{C}$  and  $170^{\circ}\text{C}$ ) for the AROP of  $\epsilon$ -caprolactam for two combinations a) DL/ACL and b) DL/DCCI at two concentrations.

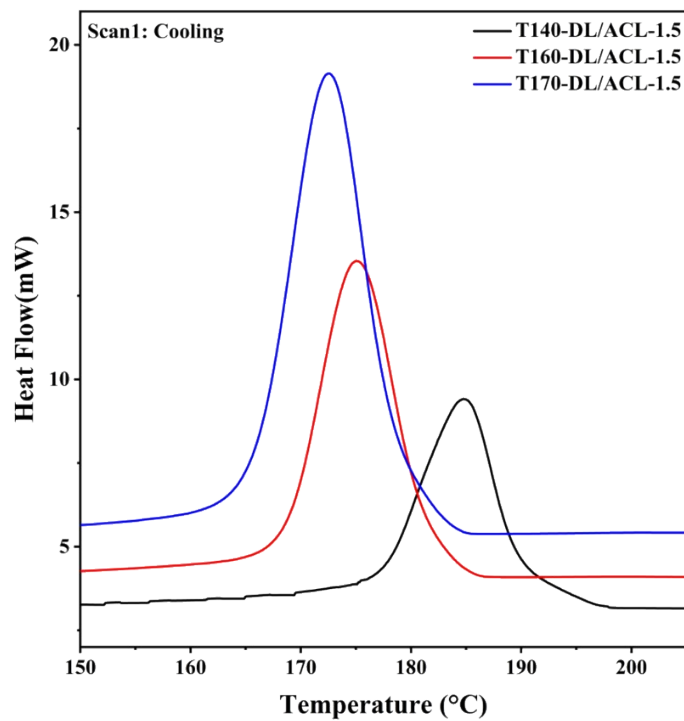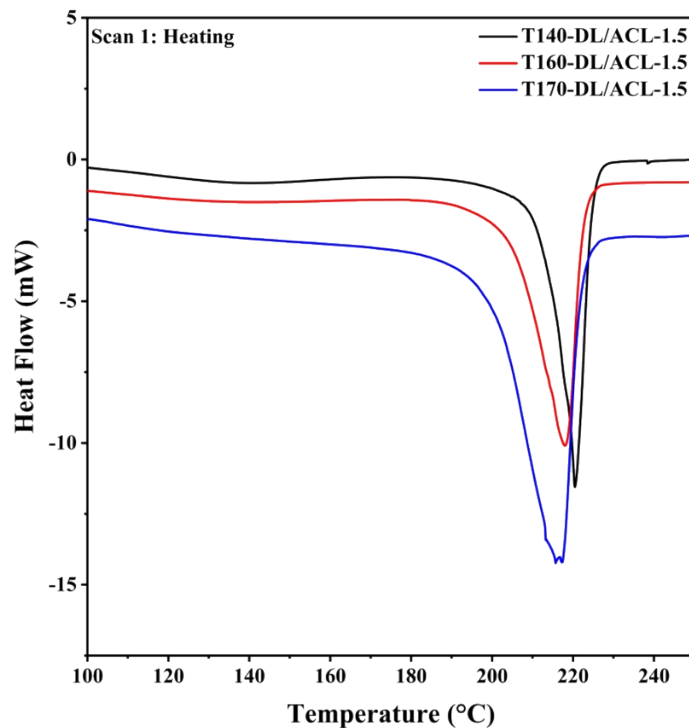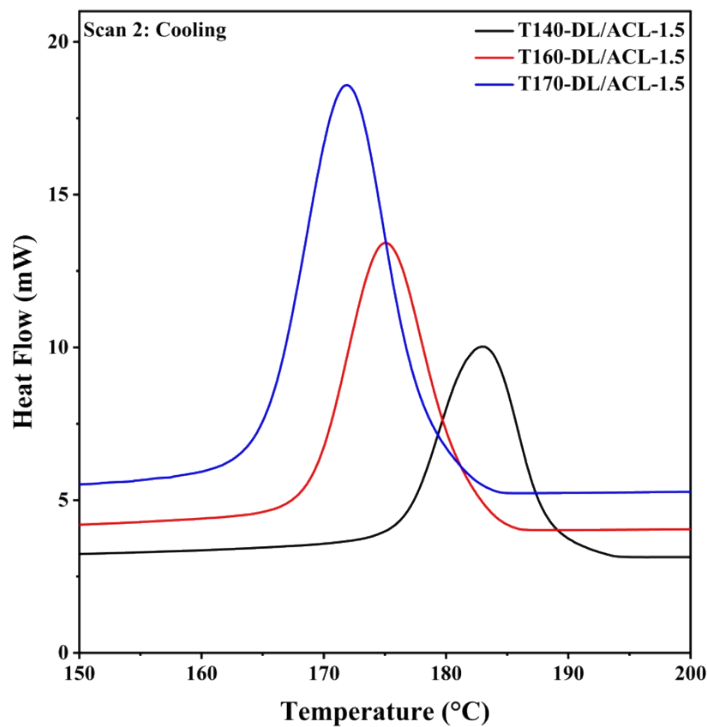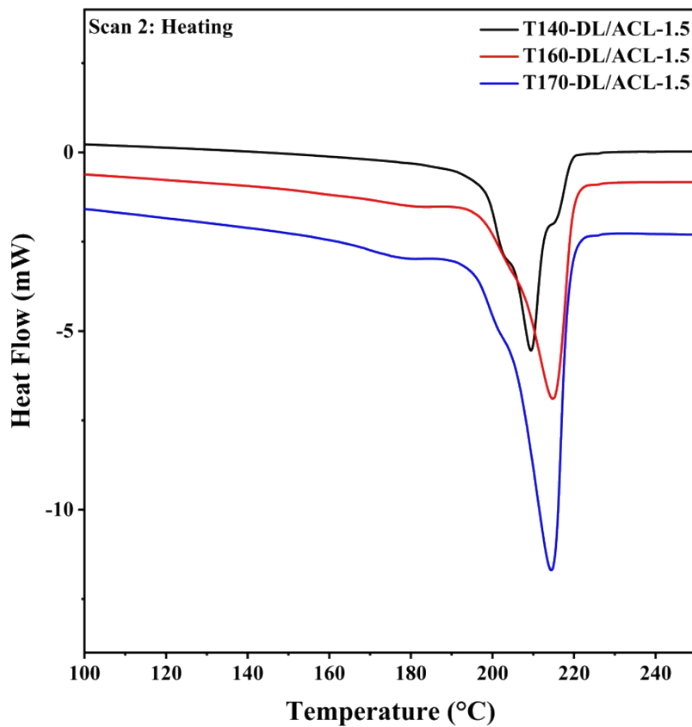

**Fig.S3** DSC thermograms during first and second scan of poly- $\epsilon$ -caproamide (PA6) using DL/ACL-1.5 as the catalyst/activator system polymerized at 140°C, 160°C, and 170°C.

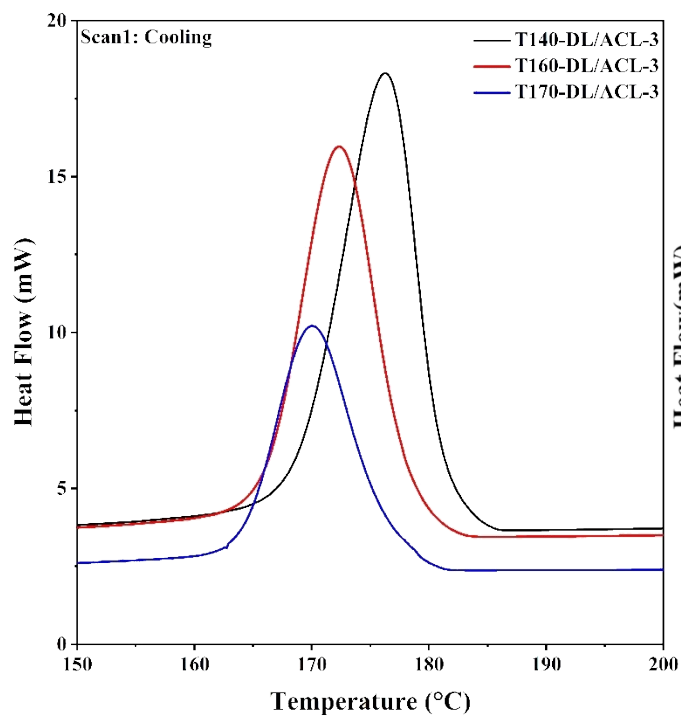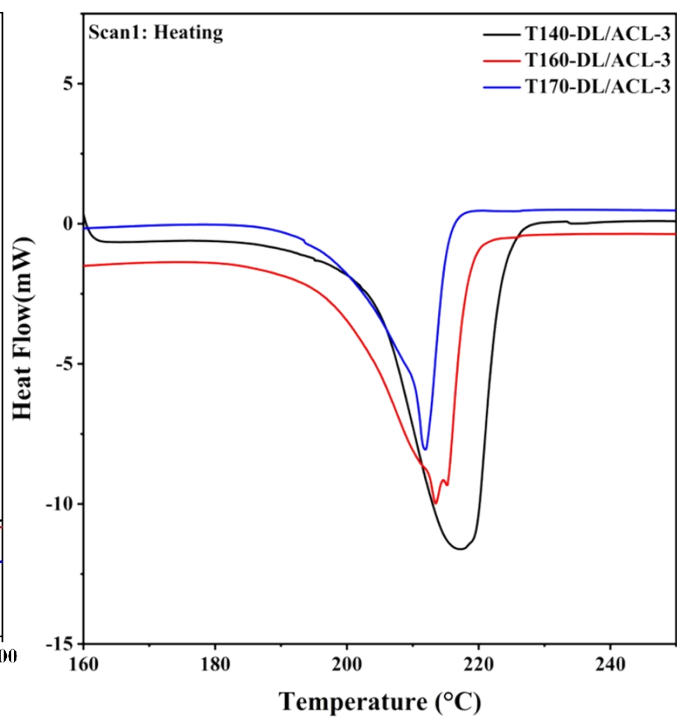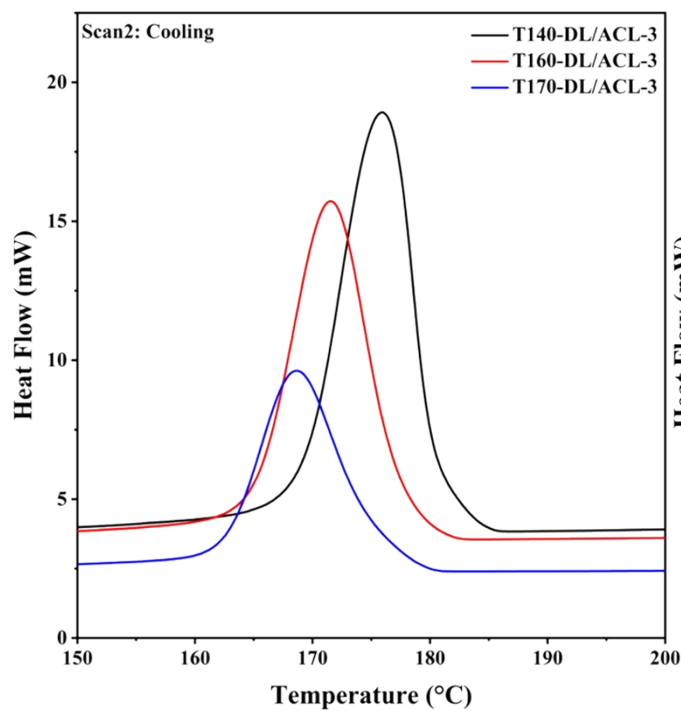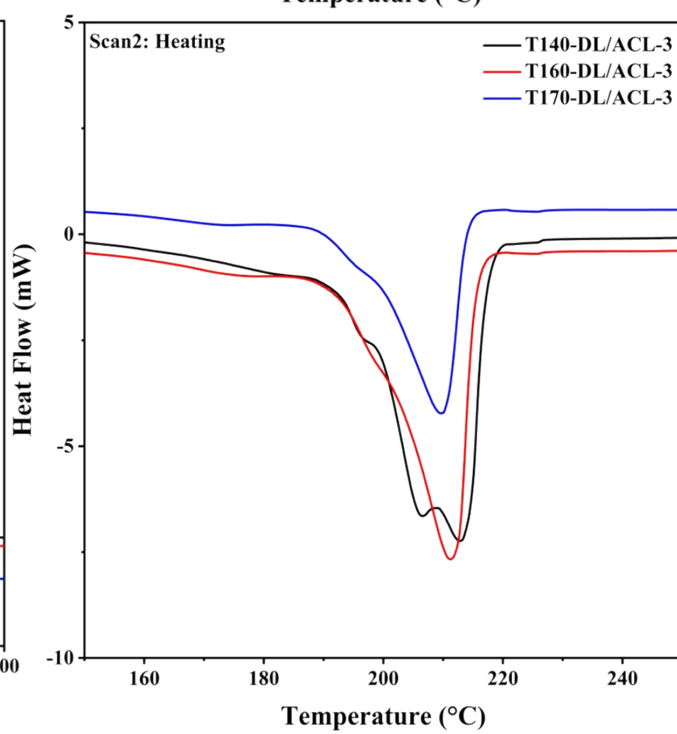

**Fig.S4** DSC thermograms during first and second scan of poly- $\epsilon$ -caproamide (PA6) using DL/ACL-3 as the catalyst/activator system polymerized at 140°C, 160°C, and 170°C.



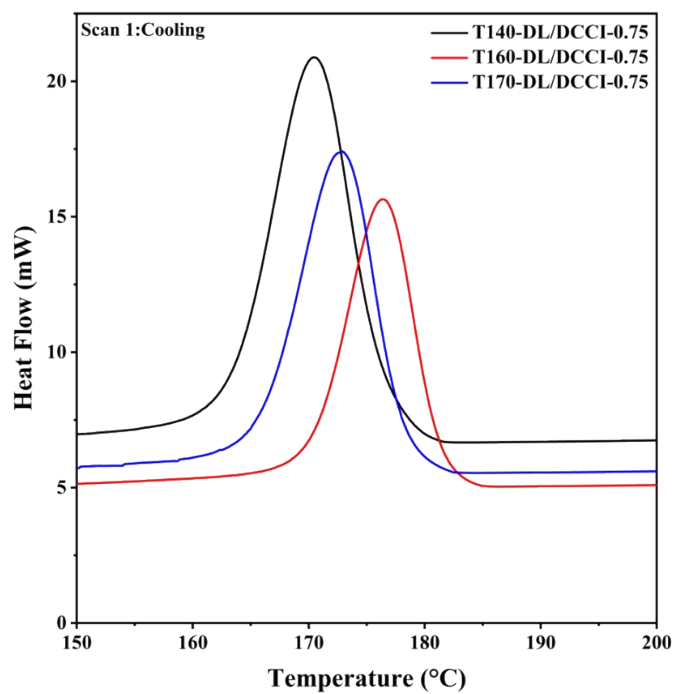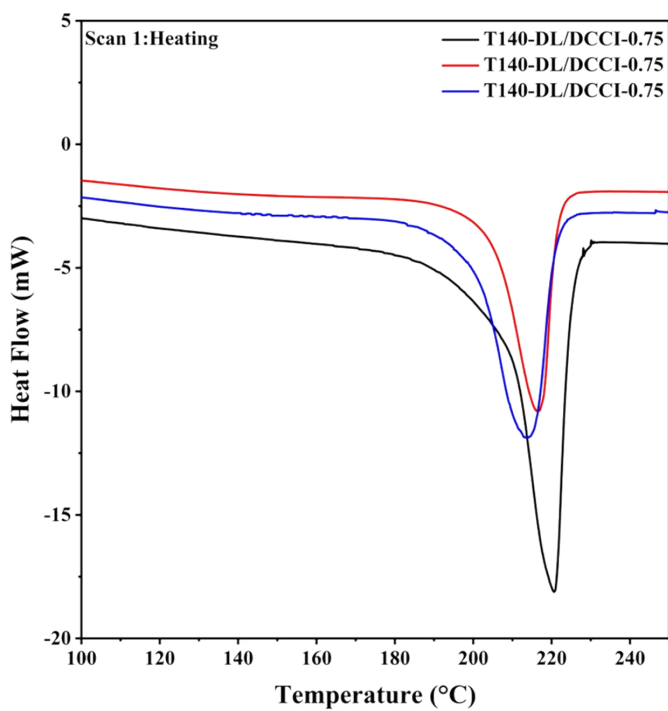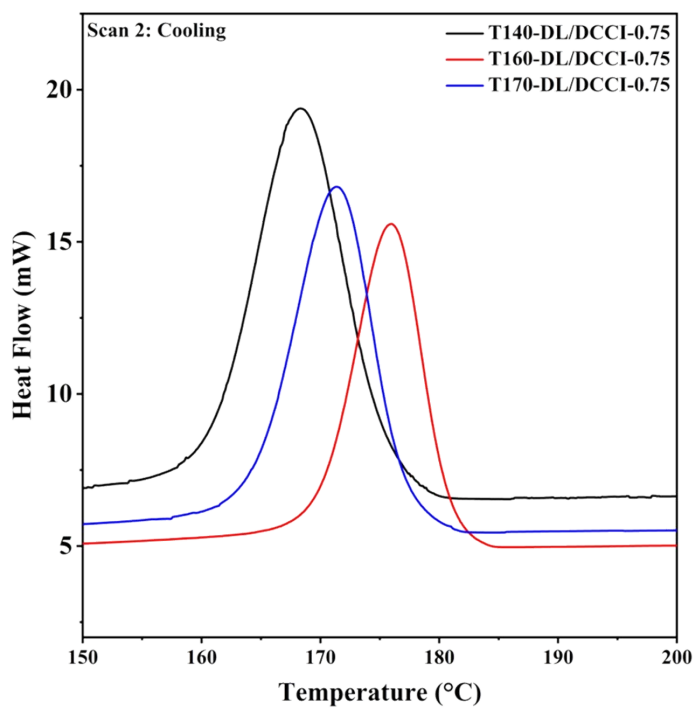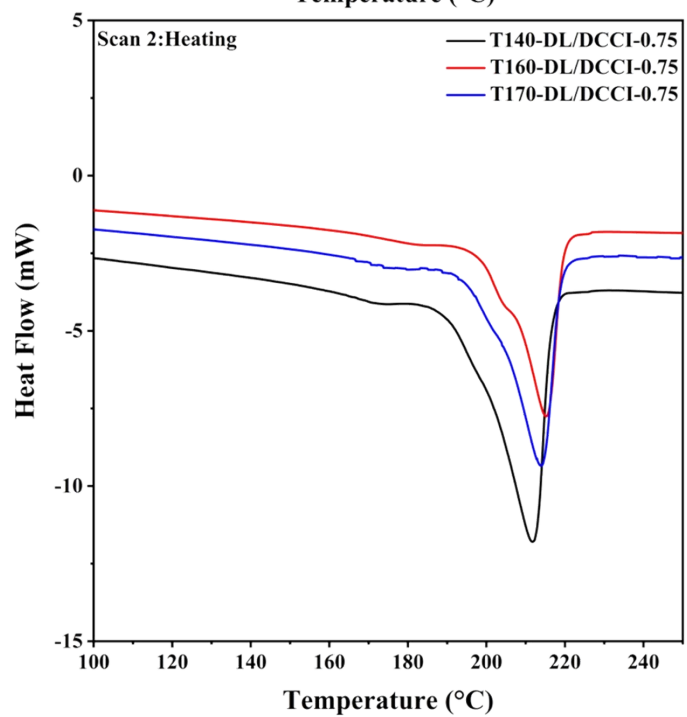

**Fig.S5** DSC thermograms during first and second scan of poly- $\epsilon$ -caproamide (PA6) using DL/DCCI-0.75 as the catalyst/activator system polymerized at 140°C, 160°C, and 170°C.

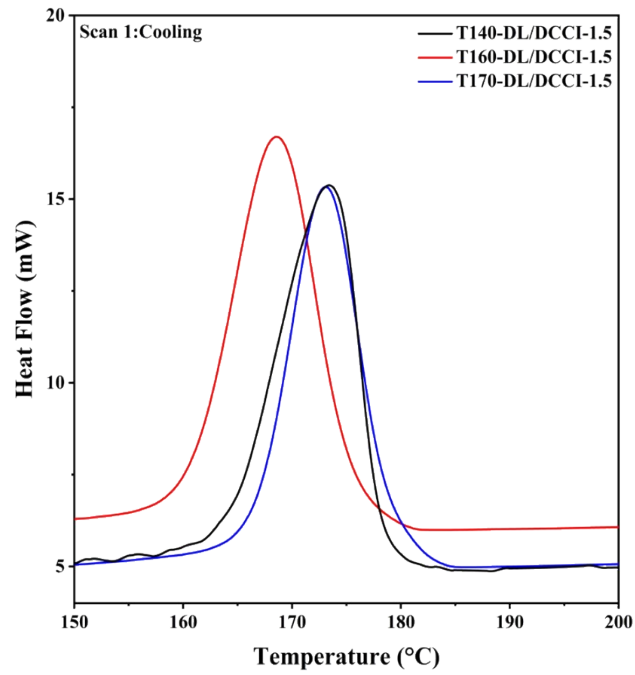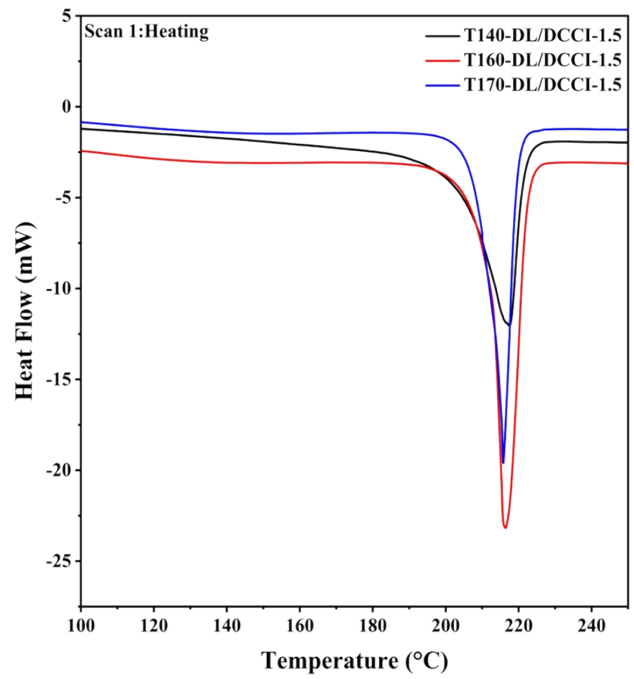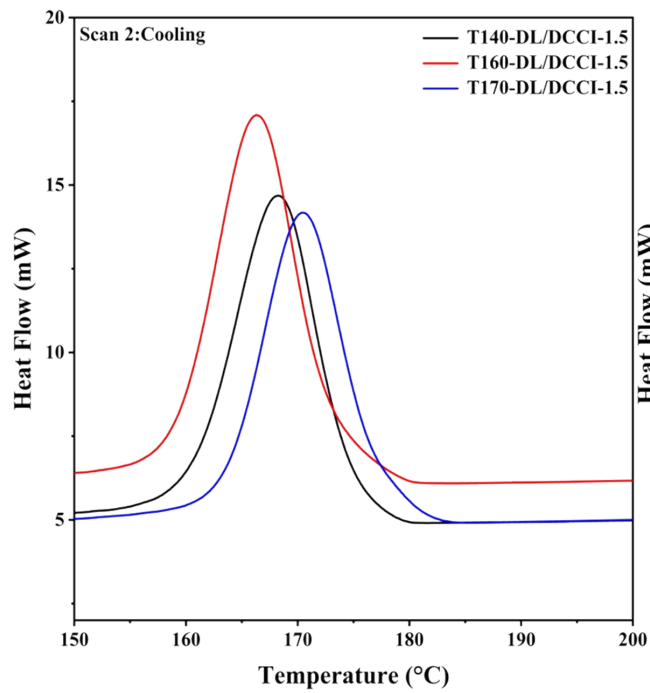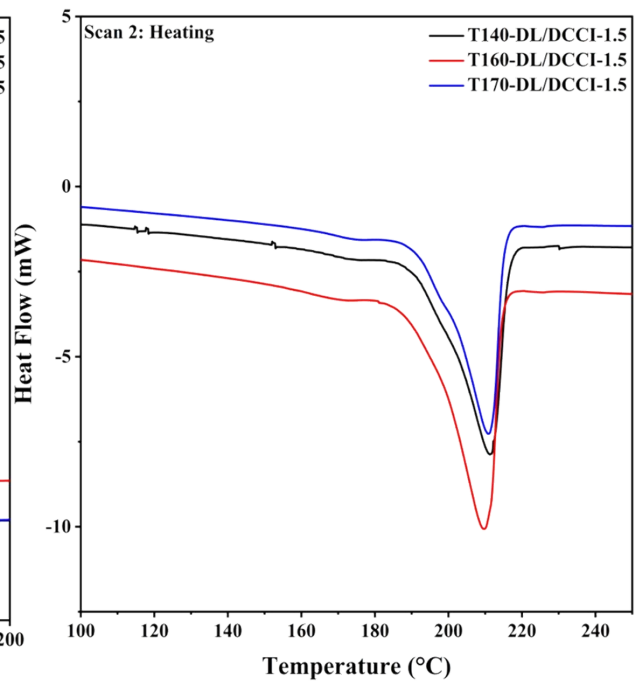

**Fig.S6** DSC thermograms during first and second scan of poly- $\epsilon$ -caproamide (PA6) using DL/DCCI-1.5 as the catalyst/activator system polymerized at 140°C, 160°C, and 170°C.

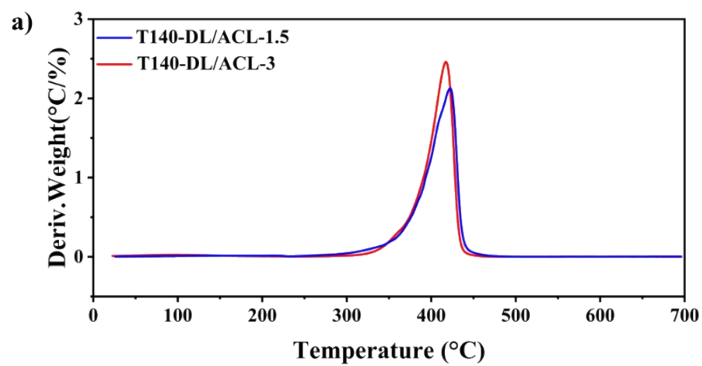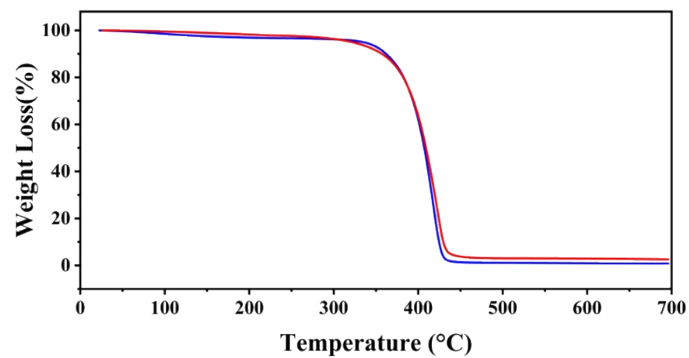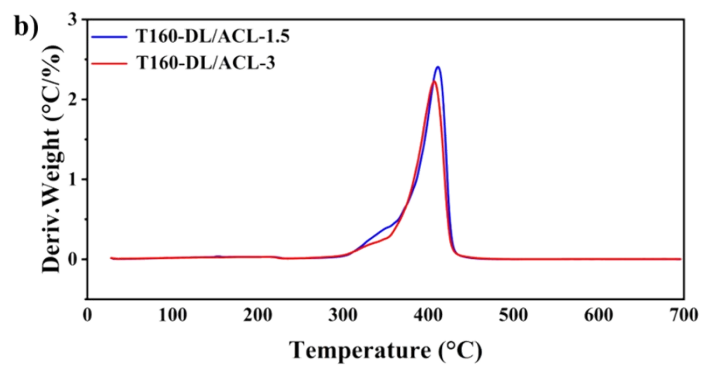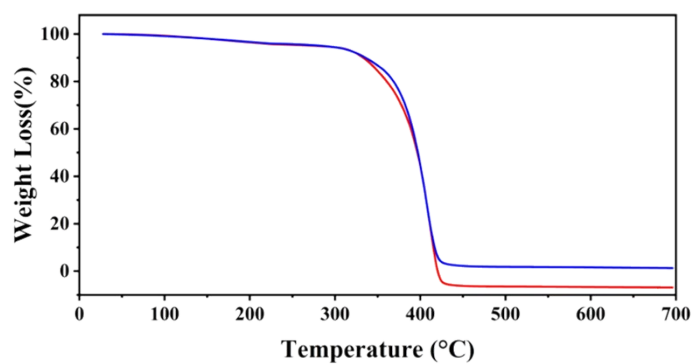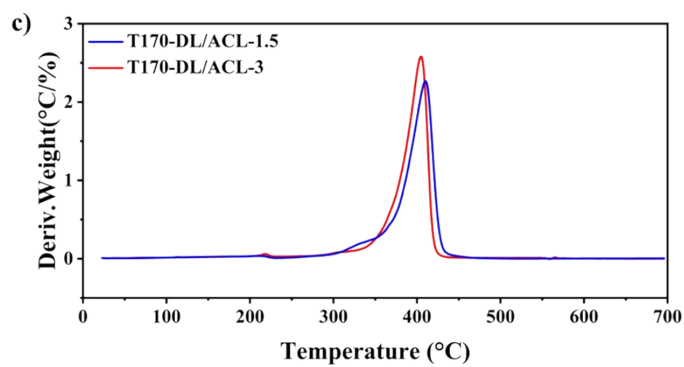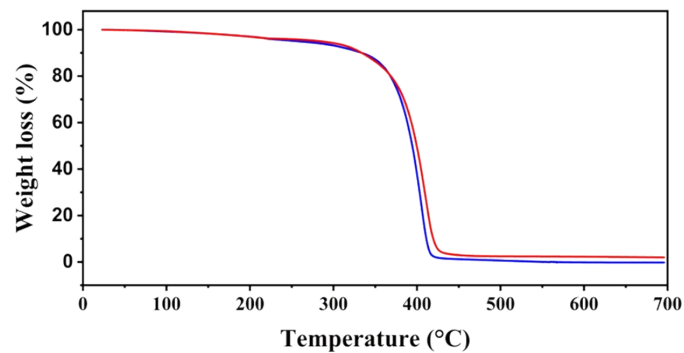

**Fig.S7** TGA and DTG curves of poly- $\epsilon$ -caproamide (PA6) for formulations DL/ACL-1.5 and DL/ACL-3 polymerized at a) 140°C, b) 160°C, and c) 170°C.

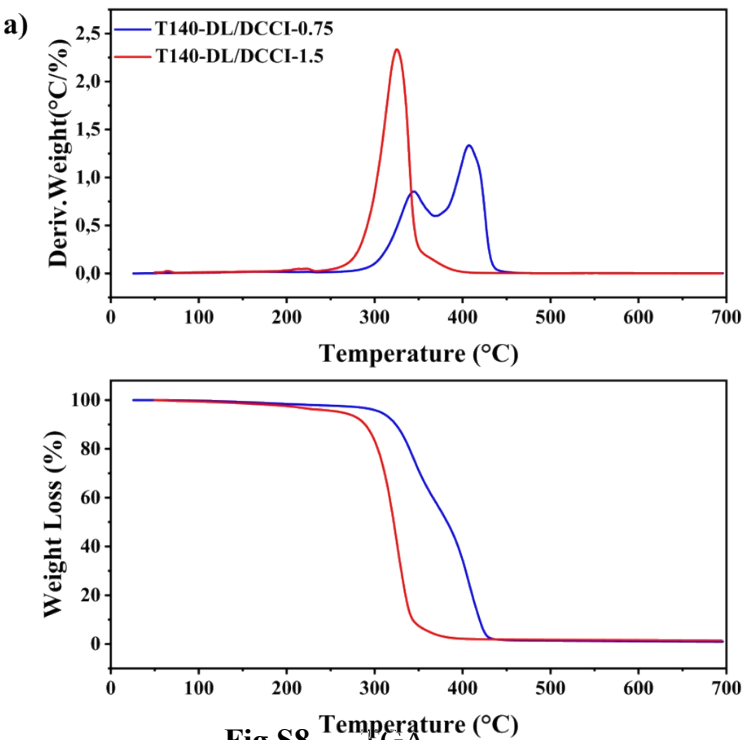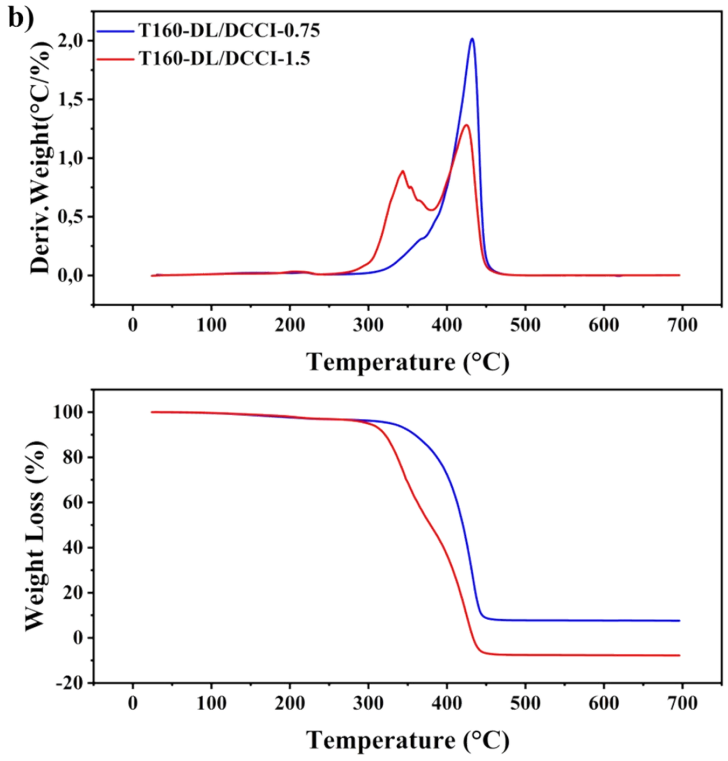

Fig.S8 TGA

and DTG  
curves of  
the poly-ε-

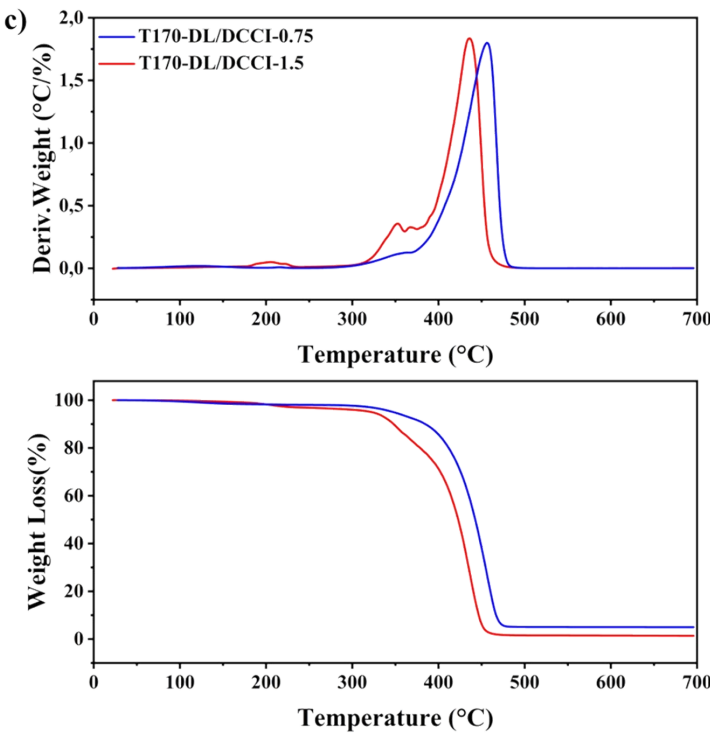

caproamide (PA6) for formulations DL/DCCI-0.75 and DL/DCCI-1.5 polymerized at a) 140°C, b) 160°C, and c) 170°C.

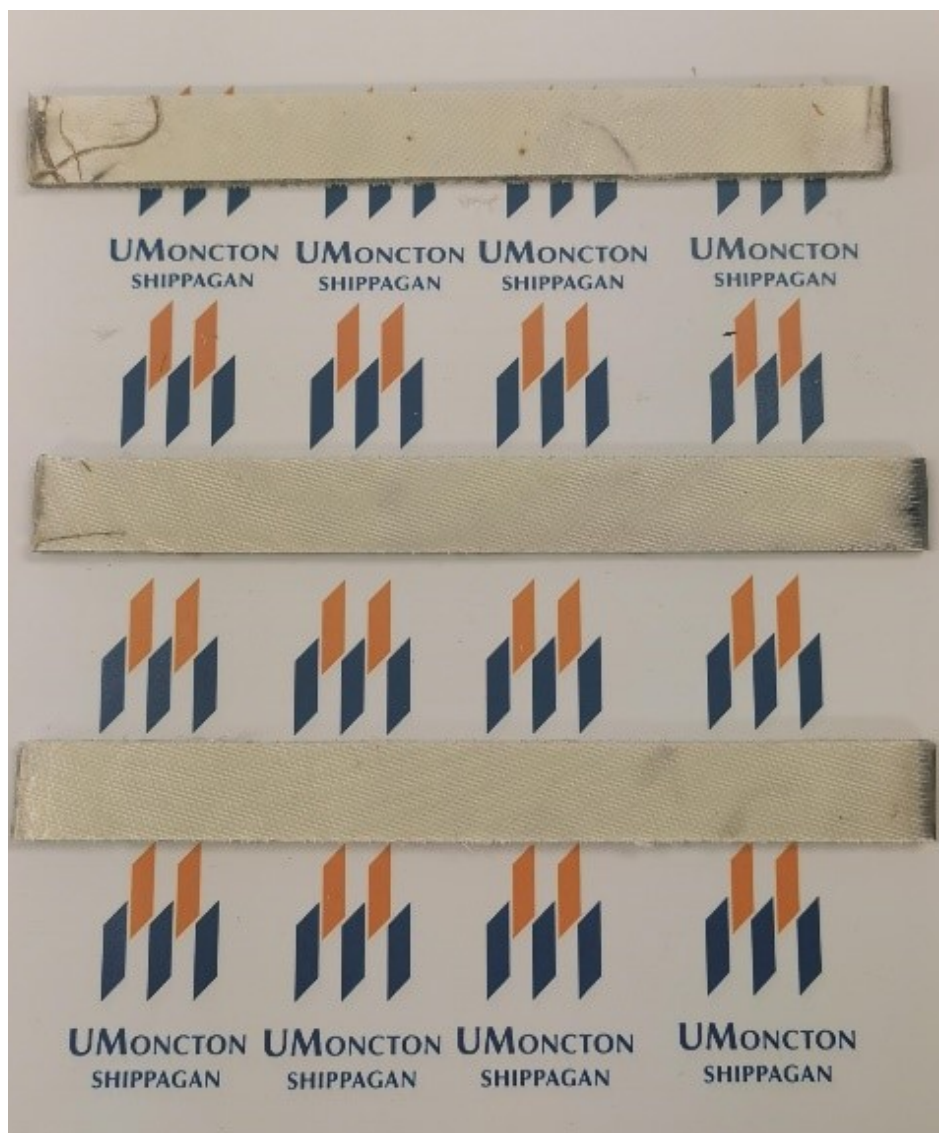

**Fig. S9** Manufactured PA-6 hybrid composites reinforced with E-glass and treated hemp fibers, containing 20 wt% glass fiber and 5 wt% treated hemp fiber.
